# Supplementary material
Source: publisher figshare collection journal article supplement (https://sage.figshare.com/ndownloader/files/13585835)
Supplement: Supplementary file 1 [file 13585835]

# Why country-dummies (sometimes) do not do the job: Getting the within estimator of cross-level interactions in multilevel models with pooled cross-sections

## Online Appendix A: Systematic Literature Review

This part of the online appendix contains the full results of our literature review of articles published in the *Journal of European Social Policy* (JESP) and the *American Sociological Review* (ASR).

We performed keyword searches for the term “multilevel” in both Journals’ search engines. The search was done on March, 21<sup>st</sup>, 11:35 a.m., 2016 for JESP and on April, 27<sup>th</sup>, 10:02 a.m., 2016 for ASR. Table OA1 contains all articles returned from JESP’s search engine and our coding of them. Table OA2 lists the results from ASR’s search engine and our coding of them.

### Explanation of the columns and the coding procedure:

- **ID** is an internal ID that we assigned to each article returned from the search engine.
- **Author(s), Title, Year, Vol, No and Pages** provide the author(s) name(s), the articles title, the year of publication, the journal volume and issues number as well as the page numbers.
- **ML Structure** is equal to 1 if the article uses data where units are nested in multiple geographical clusters and 0 otherwise. All remaining columns have been coded only if *ML Structure* was equal to 1. (Comments and replications of previous analyses are coded 0 even if they use multilevel modeling).
- **Country as Context** is equal to 1 if the higher-level clusters are countries and 0 otherwise
- **Multiple Years** is equal to 1 if the article is based on data from multiple time-points and 0 otherwise.
- **Interest in Main Effect** is 1 if the author(s) had a substantial interest in the direct/main effect of a cluster-level variable and 0 otherwise.
- **Interest in Interaction Effect** is 1 if the author(s) had a substantial interest in a cross-level interaction effect and 0 otherwise.
- **Context Variable Time-constant in Data** is equal to 1 if the contextual-level variable did not vary in the data used for the analysis and 0 otherwise. The column does not contain a value if the article did not use any contextual-level variables or if we were not able to determine from the text what the correct value is.
- **Context Variable Time-constant by Nature** is equal to 1 if the contextual-level variable is time-invariant by its nature and 0 otherwise. The column does not contain a value if the article did not use any contextual-level variables or if we were not able to determine from the text what the correct value is.
- **Using CFE** equals 1 if the article employs a (Context-level) Fixed Effects model and 0 otherwise. The remaining column (*Longitudinal Within-context Effect*) has been coded only if *Using CFE* was equal to 1.
- **Longitudinal Within-context Effect** is only coded if *Using CFE* was 1. This column is equal to 1 if the Fixed Effects model has been used to get a context effect which is identified by within-context variation over time. This column is necessary as not all Fixed Effects models necessarily do so.

**Table OA1: Literature Review of Articles published in JESP**

| ID | Author(s)                                | Year     | Title                                                                                                                                              | Vol | No | Pages   | ML<br>Structure | Countr<br>y | Multipl<br>as e Years | Interest<br>in Main<br>Effects | Interest<br>Interaction<br>Effects | in Context<br>Variable<br>Time-<br>constant<br>in Data | Context<br>Variable<br>Time-<br>Constant<br>by<br>Nature | Using<br>CFE | Longitudina<br>l Within-<br>Context<br>Effect |
|----|------------------------------------------|----------|----------------------------------------------------------------------------------------------------------------------------------------------------|-----|----|---------|-----------------|-------------|-----------------------|--------------------------------|------------------------------------|--------------------------------------------------------|----------------------------------------------------------|--------------|-----------------------------------------------|
| 1  | Flavia Fossati                           | 2011     | The effect of integration and social democratic welfare states on immigrants' educational attainment: a multilevel estimate                        | 21  | 5  | 391-412 | 1               | 1           | 0                     | 1                              | 1                                  | 0                                                      | 1                                                        | 0            |                                               |
| 2  | Mikael Rostila                           | 2007     | Social capital and health in European welfare regimes: a multilevel approach                                                                       | 17  | 3  | 223-239 | 1               | 1           | 0                     | 1                              | 0                                  | 0                                                      | 1                                                        | 0            |                                               |
| 3  | Ola Sjöberg                              | 2004     | The Role of Family Policy Institutions in Explaining Gender-Role Attitudes: A Comparative Multilevel Analysis of Thirteen Industrialized Countries | 14  | 2  | 107-123 | 1               | 1           | 0                     | 1                              | 1                                  | 0                                                      | 1                                                        | 0            |                                               |
| 4  | Sarah Missinne;Bart Meuleman;Piet Bracke | 2013     | The popular legitimacy of European healthcare systems: A multilevel analysis of 24 countries                                                       | 23  | 3  | 231-247 | 1               | 1           | 0                     | 1                              | 0                                  | 0                                                      | 1                                                        | 0            |                                               |
| 5  | Wim Oorschot;Tim Reeskens;Bart Meuleman  | van 2012 | Popular perceptions of welfare state consequences: A multilevel, cross-national analysis of 25 European countries                                  | 22  | 2  | 181-197 | 1               | 1           | 0                     | 1                              | 0                                  | 0                                                      | 1                                                        | 0            |                                               |
| 6  | Stefan Angel;Karin Heitzmann             | 2015     | Over-indebtedness in Europe: The relevance of country-level variables for the over-indebtedness of private households                              | 25  | 3  | 331-351 | 1               | 1           | 0                     | 1                              | 0                                  | 0                                                      | 1                                                        | 1            |                                               |
| 7  | Owen Corrigan                            | 2014     | Migrant deprivation, conditionality of legal status and the welfare                                                                                | 24  | 3  | 223-239 | 1               | 1           | 1                     | 1                              | 0                                  | 0                                                      | 1                                                        | 0            | 0                                             |



of labour market policy

|    |                                     |         |                                                                                                               |    |   |         |   |   |   |   |   |   |   |   |
|----|-------------------------------------|---------|---------------------------------------------------------------------------------------------------------------|----|---|---------|---|---|---|---|---|---|---|---|
| 16 | Corinne Igel;Marc Szydlik           | 2011    | Grandchild care and welfare state arrangements in Europe                                                      | 21 | 3 | 210-224 | 1 | 1 | 0 | 1 | 0 | 0 | 1 | 0 |
| 17 | Johannes Siegrist;Morten Wahrendorf | 2009    | Participation in socially productive activities and quality of life in early old age: findings from SHARE     | 19 | 4 | 317-326 | 1 | 1 | 1 | 0 | 0 |   |   | 0 |
| 18 | Ursula Dallinger                    | 2010    | Public support for redistribution: what explains cross-national differences?                                  | 20 | 4 | 333-349 | 1 | 1 | 0 | 1 | 0 | 0 | 1 | 0 |
| 19 | Martin Heidenreich                  | 2003    | Regional Inequalities in the Enlarged Europe                                                                  | 13 | 4 | 313-333 | 0 |   |   |   |   |   |   |   |
| 20 | Ewan Carr;Heejung Chung             | 2014    | Employment insecurity and life satisfaction: The moderating influence of labour market policies across Europe | 24 | 4 | 383-399 | 1 | 1 | 0 | 1 | 1 | 0 | 1 | 0 |
| 21 | Marius Busemeyer                    | R. 2012 | Inequality and the political economy of education: An analysis of individual preferences in OECD countries    | 22 | 3 | 219-240 | 1 | 1 | 0 | 1 | 1 | 0 | 1 | 0 |
| 22 | Kenneth Nelson                      | 2012    | Counteracting material deprivation: The role of social assistance in Europe                                   | 22 | 2 | 148-163 | 1 | 1 | 0 | 1 | 1 | 0 | 1 | 0 |
| 23 | Steffen Mau;Christoph Burkhardt     | 2009    | Migration and welfare state solidarity in Western Europe                                                      | 19 | 3 | 213-229 | 1 | 1 | 0 | 1 | 0 | 0 | 1 | 0 |
| 24 | Tim Lang;Geof Rayner                | 2005    | Obesity: a growing issue for European policy?                                                                 | 15 | 4 | 301-327 | 0 |   |   |   |   |   |   |   |
| 25 | Mads Meier Jæger                    | 2013    | The effect of macroeconomic and social conditions on the demand for redistribution: A                         | 23 | 2 | 149-163 | 1 | 1 | 1 | 1 | 0 | 1 | 1 | 1 |

pseudo panel approach

|    |                                                                                     |      |                                                                                                                      |    |   |         |   |   |   |   |   |   |   |   |
|----|-------------------------------------------------------------------------------------|------|----------------------------------------------------------------------------------------------------------------------|----|---|---------|---|---|---|---|---|---|---|---|
| 26 | Henning Finseraas                                                                   | 2012 | Poverty, ethnic minorities among the poor, and preferences for redistribution in European regions                    | 22 | 2 | 164-180 | 1 | 1 | 0 | 1 | 1 | 0 | 1 | 1 |
| 27 | Staffan Kumlin                                                                      | 2009 | Blaming Europe? Exploring the variable impact of national public service dissatisfaction on EU trust                 | 19 | 5 | 408-420 | 1 | 1 | 0 | 1 | 1 | 0 | 1 | 0 |
| 28 | Marii Paskov;Ferry Koster                                                           | 2014 | Institutions, employment insecurity and polarization in support for unemployment benefits                            | 24 | 4 | 367-382 | 1 | 1 | 0 | 1 | 1 | 0 | 1 | 0 |
| 29 | Patrizia Aurich-Beerheide;Serida L. Catalano;Paolo R. Graziano;Katharina Zimmermann | 2015 | Stakeholder participation and policy integration in local social and employment policies: Germany and Italy compared | 25 | 4 | 379-392 | 0 |   |   |   |   |   |   |   |
| 30 | Allison E Rovny                                                                     | 2014 | The capacity of social policies to combat poverty among new social risk groups                                       | 24 | 5 | 405-423 | 1 | 1 | 0 | 1 | 1 | 0 | 1 | 0 |
| 31 | Heejung Chung;Steffen Mau                                                           | 2014 | Subjective insecurity and the role of institutions                                                                   | 24 | 4 | 303-318 | 0 |   |   |   |   |   |   |   |
| 32 | Christopher T Whelan;Brian Nolan;Bertrand Maître                                    | 2014 | Multidimensional poverty measurement in Europe: An application of the adjusted headcount approach                    | 24 | 2 | 183-197 | 1 | 1 | 0 | 1 | 1 | 0 | 1 | 0 |
| 33 | Helena Blomberg;Christian Kroll;Johanna Kallio;Jani Erola                           | 2013 | Social workers' perceptions of the causes of poverty in the Nordic countries                                         | 23 | 1 | 68-82   | 1 | 0 | 0 | 1 | 0 | 0 | 1 | 0 |
| 34 | Erik van Ingen;Tom van der                                                          | 2011 | Welfare state expenditure and inequalities in                                                                        | 21 | 4 | 302-322 | 1 | 1 | 0 | 1 | 1 | 0 | 1 | 0 |

|    | Meer                                  |           | voluntary participation                                                                                                                                     | association |   |         |   |   |   |   |   |   |   |   |   |  |  |  |
|----|---------------------------------------|-----------|-------------------------------------------------------------------------------------------------------------------------------------------------------------|-------------|---|---------|---|---|---|---|---|---|---|---|---|--|--|--|
| 35 | Nam K. Jo                             | 2011      | Between the foundations of welfare and welfare attitudes: The possibility of an in-between level conception of culture for the cultural analysis of welfare | 21          | 1 | 5-19    | 0 |   |   |   |   |   |   |   |   |  |  |  |
| 36 | Yekaterina Chzhen;Jonathan Bradshaw   | 2012      | Lone parents, poverty and policy in the European Union                                                                                                      | 22          | 5 | 487-506 | 1 | 1 | 0 | 1 | 0 | 0 | 1 | 0 |   |  |  |  |
| 37 | Anne Grönlund;Ida Öun                 | 2010      | Rethinking work-family conflict: dual-earner policies, role conflict and role expansion in Western Europe                                                   | 20          | 3 | 179-195 | 1 | 1 | 0 | 1 | 0 | 0 | 0 | 0 |   |  |  |  |
| 38 | Martin Heidenreich                    | 2015      | The end of the honeymoon: The increasing differentiation of (long-term) unemployment risks in Europe                                                        | 25          | 4 | 393-413 | 1 | 1 | 1 | 1 | 1 | 1 | 1 | 0 | 0 |  |  |  |
| 39 | Varvara Lalioti                       | 2016      | The curious case of the guaranteed minimum income (GMI): Highlighting Greek 'exceptionalism' in a Southern European context                                 | 26          | 1 | 80-93   | 0 |   |   |   |   |   |   |   |   |  |  |  |
| 40 | Dennis Spies;Alexander Schmidt-Catran | 2016      | Migration, migrant integration and support for social spending: The case of Switzerland                                                                     | 26          | 1 | 32-47   | 1 | 0 | 0 | 1 | 0 | 0 | 1 | 0 |   |  |  |  |
| 41 | Anna Christensen                      | Diop-2015 | Is 'making work pay' effective for the 'unemployable'? The impact of benefit sanctions on social assistance recipients in                                   | 25          | 2 | 210-224 | 1 | 0 | 1 | 1 | 1 | 1 | 1 | 0 |   |  |  |  |

Denmark

|    |                                                 |         |                                                                                                                  |    |   |         |   |   |   |   |   |   |   |     |
|----|-------------------------------------------------|---------|------------------------------------------------------------------------------------------------------------------|----|---|---------|---|---|---|---|---|---|---|-----|
| 42 | Jason Jordan                                    | 2013    | Policy feedback and support for the welfare state                                                                | 23 | 2 | 134-148 | 1 | 1 | 0 | 1 | 0 | 0 | 1 | 0   |
| 43 | Dorottya Szikra                                 | 2014    | Democracy and welfare in hard times: The social policy of the Orbán Government in Hungary between 2010 and 2014  | 24 | 5 | 486-500 | 0 |   |   |   |   |   |   |     |
| 44 | Liz Gosme                                       | 2014    | Key steps towards a European Union homelessness policy                                                           | 24 | 3 | 289-299 | 0 |   |   |   |   |   |   |     |
| 45 | Christopher Whelan; Bertrand Maître             | T. 2009 | Europeanization of inequality and European reference groups                                                      | 19 | 2 | 117-130 | 1 | 1 | 0 | 0 | 0 |   |   | 1   |
| 46 | Hanna Kleider                                   | 2015    | Paid and unpaid work: The impact of social policies on the gender division of labour                             | 25 | 5 | 505-520 | 1 | 1 | 0 | 1 | 0 | 0 | 1 | 0   |
| 47 | Björn Halleröd; Hans Ekbrand; Mattias Bengtsson | 2015    | In-work poverty and labour market trajectories: Poverty risks among the working population in European countries | 25 | 5 | 473-488 | 1 | 1 | 1 | 0 | 0 |   |   | 0   |
| 48 | Ingalill Montanari; Kenneth Nelson              | 2013    | Social service decline and convergence: How does healthcare fare?                                                | 23 | 1 | 102-116 | 0 |   |   |   |   |   |   | 0   |
| 49 | Brian Burgoon; Ferry Koster; Marcel van Egmond  | 2012    | Support for redistribution and the paradox of immigration                                                        | 22 | 3 | 288-304 | 1 | 1 | 1 | 1 | 0 | 1 | 1 | 1 0 |
| 50 | Akvile Motiejunaite; Zhanna Kravchenko          | 2008    | Family policy, employment and gender-role attitudes: a comparative analysis of Russia and Sweden                 | 18 | 1 | 38-49   | 0 |   |   |   |   |   |   |     |

|    |                                                      |      |                                                                                                                                                |    |   |         |   |   |   |   |   |   |   |   |
|----|------------------------------------------------------|------|------------------------------------------------------------------------------------------------------------------------------------------------|----|---|---------|---|---|---|---|---|---|---|---|
| 51 | Gunnar Andersson;Ann-Zofie Duvander;Karsten Hank     | 2004 | Do child-care characteristics influence continued child bearing in Sweden? An investigation of the quantity, quality, and price dimension      | 14 | 4 | 407-418 | 1 | 0 | 1 | 1 | 0 | 1 | 1 | 1 |
| 52 | Costanzo Ranci;Emmanuele Pavolini                    | 2015 | Not all that glitters is gold: Long-term care reforms in the last two decades in Europe                                                        | 25 | 3 | 270-285 | 0 |   |   |   |   |   |   |   |
| 53 | Sebastian Künzel                                     | 2012 | The local dimension of active inclusion policy                                                                                                 | 22 | 1 | 3-16    | 0 |   |   |   |   |   |   |   |
| 54 | Cyrielle Champion;Guiliano Bonoli                    | 2011 | Institutional fragmentation and coordination initiatives in western European welfare states                                                    | 21 | 4 | 323-334 | 0 |   |   |   |   |   |   |   |
| 55 | Heejung Chung;Wim van Oorschot                       | 2011 | Institutions versus market forces: Explaining the employment insecurity of European individuals during (the beginning of) the financial crisis | 21 | 4 | 287-301 | 1 | 1 | 0 | 1 | 1 | 0 | 1 | 0 |
| 56 | John Gal                                             | 2010 | Is there an extended family of Mediterranean welfare states?                                                                                   | 20 | 4 | 283-300 | 0 |   |   |   |   |   |   |   |
| 57 | Claus Wendt                                          | 2009 | Mapping European healthcare systems: a comparative analysis of financing, service provision and access to healthcare                           | 19 | 5 | 432-445 | 0 |   |   |   |   |   |   |   |
| 58 | Mauricio Avendano;Hendrik Jürges;Johan P. Mackenbach | 2009 | Educational level and changes in health across Europe: longitudinal results from SHARE                                                         | 19 | 4 | 301-316 | 1 | 1 | 0 | 1 | 1 |   | 0 | 0 |
| 59 | Olli Kangas;Tine Rostgaard                           | 2007 | Preferences or institutions? Work—family life opportunities in seven European countries                                                        | 17 | 3 | 240-256 | 1 | 1 | 0 | 1 | 0 | 0 | 1 | 0 |



[illegible]

|    |                                                                                                    |         |                                                                                                                                                                                |        |   |             |                                                                  |
|----|----------------------------------------------------------------------------------------------------|---------|--------------------------------------------------------------------------------------------------------------------------------------------------------------------------------|--------|---|-------------|------------------------------------------------------------------|
| 70 | Niklas Jakobsson;Andreas Kotsadam                                                                  | 2010    | Do attitudes toward gender equality really differ between Norway and Sweden?                                                                                                   | 20     | 2 | 142-<br>159 | 0                                                                |
| 71 | Axel Börsch-Supan;Karsten Hank;Hendrik Jürges;Mathis Schröder                                      | - 2009  | Introduction: empirical research on health, ageing and retirement in Europe                                                                                                    | 19     | 4 | 293-<br>300 | 0                                                                |
| 72 | Ian Gough;James Meadowcroft;John Dryzek;Jürgen Gerhards;Holger Lengfeld;Anil Markandya;Ramon Ortiz | 2008    | JESP symposium: Climate change and social policy                                                                                                                               | 18     | 4 | 325-<br>344 | 1<br><br>1<br><br>0<br><br>1<br><br>0<br><br>0<br><br>1<br><br>0 |
| 73 | David J. Bailey                                                                                    | 2008    | Explaining underdevelopment of `Social Europe': a critical realization                                                                                                         | the 18 | 3 | 232-<br>245 | 0                                                                |
| 74 | Georg Vobruba;Maurizio Bach;Martin Rhodes;Julia Szalai                                             | 2004    | Debate on the enlargement of the European Union: The enlargement crisis of the European Union: limits of the dialectics of integration and expansion                           | 14     | 4 | 447-<br>448 | 0                                                                |
| 75 | Christine Quittkat                                                                                 | 2002    | Book Reviews: Ester Neunreither Die Interessenvertretung der Regionen bei der Europäischen Union. Deutsche Länder, spanische Autonome Gemeinschaften und französische Regionen | B. 12  | 2 | 171-<br>172 | 0                                                                |
| 76 | Caroline de la Porte;Philippe Pochet;Belgium Graham Room                                           | la 2001 | Social Benchmarking, Policy Making and New Governance in the Eu                                                                                                                | 11     | 4 | 291-<br>307 | 0                                                                |

|    |                 |      |      |                                                                  |    |   |         |   |   |   |   |   |   |
|----|-----------------|------|------|------------------------------------------------------------------|----|---|---------|---|---|---|---|---|---|
| 77 | Francisco León  | José | 2012 | Reciprocity and support for the redistributive role of the State | 22 | 2 | 198-215 | 1 | 1 | 0 | 0 | 0 | 0 |
| 78 | Philippe Pochet |      | 1999 | The New Employment Chapter of the Amsterdam Treaty               | 9  | 3 | 271-278 | 0 |   |   |   |   |   |

---

**Table OA2: Literature Review of Articles published in ASR**

| ID | Author(s)                                            | Year | Title                                                                                                                                           | Vol | No | Pages   | ML<br>Structure | Country<br>as<br>Context | Multiple<br>Years | Interest<br>in<br>Main<br>Effects | Interest in<br>Interaction<br>Effects | Context<br>Variable<br>Time-<br>constant<br>in Data | Context<br>Variable<br>Time-<br>Constant<br>by<br>Nature | Using<br>CFE | Longitudinal<br>Within-<br>Context<br>Effect |
|----|------------------------------------------------------|------|-------------------------------------------------------------------------------------------------------------------------------------------------|-----|----|---------|-----------------|--------------------------|-------------------|-----------------------------------|---------------------------------------|-----------------------------------------------------|----------------------------------------------------------|--------------|----------------------------------------------|
| 1  | Abrutyn, Seth;<br>Mueller, Anna<br>S.                | 2014 | Are Suicidal Behaviors Contagious in Adolescence? Using Longitudinal Data to Examine Suicide Suggestion                                         | 79  | 2  | 211–227 | 0               |                          |                   |                                   |                                       |                                                     |                                                          |              |                                              |
| 2  | Adamczyk, Amy;<br>Hayes, Brittany E.                 | 2012 | Religion and Sexual Behaviors: Understanding the Influence of Islamic Cultures and Religious Affiliation for Explaining Sex Outside of Marriage | 77  | 5  | 723–746 | 1               | 1                        | 1                 | 1                                 | 1                                     | 1                                                   | 1                                                        | 0            | 0                                            |
| 3  | Baggetta, Matthew;<br>Hahrie;<br>Andrews, Kenneth T. | 2013 | Leading Associations: How Individual Characteristics and Team Dynamics Generate Committed Leaders                                               | 78  | 4  | 544–573 | 1               | 0                        | 0                 | 1                                 | 0                                     | 0                                                   | 1                                                        | 0            |                                              |
| 4  | Bail, Christopher A.                                 | 2008 | The Configuration of Symbolic Boundaries against Immigrants in Europe                                                                           | 73  | 1  | 37–59   | 0               |                          |                   |                                   |                                       |                                                     |                                                          |              |                                              |
| 5  | Bail, Christopher A.                                 | 2012 | The Fringe Effect: Civil Society Organizations and the Evolution of Media Discourse about Islam since the September 11th Attacks                | 77  | 6  | 855–879 | 1               | 0                        | 1                 | 1                                 | 1                                     | 1                                                   | 1                                                        | 0            |                                              |
| 6  | Balbo, Nicoletta;<br>Barban, Nicola                  | 2014 | Does Fertility Behavior Spread among Friends?                                                                                                   | 79  | 3  | 412–431 | 0               |                          |                   |                                   |                                       |                                                     |                                                          |              |                                              |



|    |                                                                                     |      |                                                                                                                            |    |   |         |   |   |   |   |   |   |   |   |   |
|----|-------------------------------------------------------------------------------------|------|----------------------------------------------------------------------------------------------------------------------------|----|---|---------|---|---|---|---|---|---|---|---|---|
| 15 | Browning, Christopher R.; Leventhal, Tama; Brooks-Gunn, Jeanne                      | 2005 | Sexual Initiation in Early Adolescence: The Nexus of Parental and Community Control                                        | 70 | 5 | 758–778 | 1 | 0 | 1 | 1 | 1 | 0 | 1 | 0 | 0 |
| 16 | Browning, Christopher R.; Wallace, Danielle; Feinberg, Seth L.; Cagney, Kathleen A. | 2006 | Neighborhood Social Processes, Physical Conditions, and Disaster-Related Mortality: The Case of the 1995 Chicago Heat Wave | 71 | 4 | 661–678 | 1 | 0 | 1 | 1 | 0 | 1 | 1 | 0 | 0 |
| 17 | Bruch, Sarah K.; Ferree, Myra Marx; Soss, Joe                                       | 2010 | From Policy to Polity: Democracy, Paternalism, and the Incorporation of Disadvantaged Citizens                             | 75 | 2 | 205–226 | 1 | 0 | 1 | 0 | 0 |   | 1 | 0 | 0 |
| 18 | Burt, Callie Harbin; Simons, Ronald L.; Gibbons, Frederick X.                       | 2012 | Racial Discrimination, Ethnic-Racial Socialization, and Crime: A Micro-sociological Model of Risk and Resilience           | 77 | 4 | 648–677 | 0 |   |   |   |   |   |   |   |   |
| 19 | Cha, Youngjoo                                                                       | 2010 | Reinforcing Separate Spheres: The Effect of Spousal Overwork on Men's and Women's Employment in Dual-Earner Households     | 75 | 2 | 303–329 | 0 |   |   |   |   |   |   |   |   |
| 20 | Childress, C. Clayton; Friedkin, Noah E.                                            | 2012 | Cultural Reception and Production: The Social Construction of Meaning in Book Clubs                                        | 77 | 1 | 45–68   | 1 | 0 | 0 | 1 | 1 |   |   |   |   |
| 21 | Cohen, Philip N.; Huffman, Matt L.                                                  | 2007 | Working for the Woman? Female Managers and the Gender Wage Gap                                                             | 72 | 5 | 681–704 | 1 | 0 | 0 | 1 | 0 | 0 | 1 | 0 |   |
| 22 | Condrón, Dennis J.                                                                  | 2009 | Social Class, School and Non-School Environments, and Black/White                                                          | 74 | 5 | 685–708 | 1 | 0 | 0 | 1 | 0 |   |   |   |   |

|    |                                                            |      |                                                                                                                       | Inequalities in<br>Children's Learning |   |         |   |   |   |   |   |   |   |   |   |
|----|------------------------------------------------------------|------|-----------------------------------------------------------------------------------------------------------------------|----------------------------------------|---|---------|---|---|---|---|---|---|---|---|---|
| 23 | Cornwell, Benjamin; Laumann, Edward O.; Schumm, L. Philip  | 2008 | The Social Connectedness of Older Adults: A National Profile                                                          | 73                                     | 2 | 185–203 | 0 |   |   |   |   |   |   |   |   |
| 24 | Crowder, Kyle; Pais, Jeremy; South, Scott J.               | 2012 | Neighborhood Diversity, Metropolitan Constraints, and Household Migration                                             | 77                                     | 3 | 325–353 | 1 | 0 | 1 | 1 | 0 | 1 | 1 | 0 | 0 |
| 25 | Crowder, Kyle; South, Scott J.                             | 2008 | Spatial Dynamics of White Flight: The Effects of Local and Extralocal Racial Conditions on Neighborhood Out-Migration | 73                                     | 5 | 792–812 | 1 | 0 | 1 | 1 | 0 | 1 | 1 | 0 | 0 |
| 26 | Davenport, Christian; Soule, Sarah A.; Armstrong, David A. | 2011 | Protesting While Black?: The Differential Policing of American Activism, 1960 to 1990                                 | 76                                     | 1 | 152–178 | 0 |   |   |   |   |   |   |   |   |
| 27 | Delhey, Jan; Newton, Kenneth; Welzel, Christian            | 2011 | How General Is Trust in “Most People”? Solving the Radius of Trust Problem                                            | 76                                     | 5 | 786–807 | 0 |   |   |   |   |   |   |   |   |
| 28 | Desmond, Matthew; Valdez, Nicol                            | 2013 | Unpolicing the Urban Poor: Consequences of Third-Party Policing for Inner-City Women                                  | 78                                     | 1 | 117–141 | 1 | 0 | 1 | 1 | 1 |   |   | 0 | 0 |
| 29 | Dinesen, Peter Thisted; Sonderskov, Kim Mannemar           | 2015 | Ethnic Diversity and Social Trust: Evidence from the Micro-Context                                                    | 80                                     | 3 | 550–573 | 1 | 0 | 1 | 1 | 0 | 1 | 1 | 0 | 0 |

|    |                                                           |      |                                                                                                      |    |   |          |   |   |   |   |   |   |   |   |   |
|----|-----------------------------------------------------------|------|------------------------------------------------------------------------------------------------------|----|---|----------|---|---|---|---|---|---|---|---|---|
| 30 | Downey, Douglas B.; Hippel, Paul T. von; Broh, Beckett A. | 2004 | Are Schools the Great Equalizer? Cognitive Inequality during the Summer Months and the School Year   | 69 | 5 | 613–635  | 1 | 0 | 1 | 1 | 0 |   |   | 0 | 0 |
| 31 | Edwards, Frank                                            | 2016 | Saving Children, Controlling Families: Punishment, Redistribution, and Child Protection              |    |   |          | 0 |   |   |   |   |   |   |   |   |
| 32 | England, Paula                                            | 2016 | Sometimes the Social Becomes Personal: Gender, Class, and Sexualities                                | 81 | 1 | 4–28     | 0 |   |   |   |   |   |   |   |   |
| 33 | Evans, Rhonda; Kay, Tamara                                | 2008 | How Environmentalists ‘Greened’ Trade Policy: Strategic Action and the Architecture of Field Overlap | 73 | 6 | 970–991  | 0 |   |   |   |   |   |   |   |   |
| 34 | Fiel, Jeremy E.                                           | 2013 | Decomposing School Resegregation: Social Closure, Racial Imbalance, and Racial Isolation             | 78 | 5 | 828–848  | 0 |   |   |   |   |   |   |   |   |
| 35 | Frank, Reanne; Akresh, Ilana Redstone; Lu, Bo             | 2010 | Latino Immigrants and the U.S. Racial Order: How and Where Do They Fit In?                           | 75 | 3 | 378–401  | 0 |   |   |   |   |   |   |   |   |
| 36 | Fuller, Sylvia                                            | 2008 | Job Mobility and Wage Trajectories for Men and Women in the United States                            | 73 | 1 | 158–183  | 0 |   |   |   |   |   |   |   |   |
| 37 | Gangl, Markus                                             | 2006 | Scar Effects of Unemployment: An Assessment of Institutional Complementarities                       | 71 | 6 | 986–1013 | 1 | 1 | 1 | 1 | 0 | 1 | 1 | 0 | 0 |
| 38 | Goldstein, Adam; Haveman, Heather A.                      | 2013 | Pulpit and Press: Denominational Dynamics and the Growth of Religious                                | 78 | 5 | 797–827  | 0 |   |   |   |   |   |   |   |   |



Magazines in  
Antebellum America

|    |                                                   |      |                                                                                                                  |    |   |         |   |   |   |   |   |   |   |   |   |  |  |
|----|---------------------------------------------------|------|------------------------------------------------------------------------------------------------------------------|----|---|---------|---|---|---|---|---|---|---|---|---|--|--|
| 39 | Gross, Neil                                       | 2009 | A Pragmatist Theory of Social Mechanisms                                                                         | 74 | 3 | 358–379 | 0 |   |   |   |   |   |   |   |   |  |  |
| 40 | Guo, Guang; Roettger, Michael E.; Cai, Tianji     | 2008 | The Integration of Genetic Propensities into Social-Control Models of Delinquency and Violence among Male Youths | 73 | 4 | 543–568 | 0 |   |   |   |   |   |   |   |   |  |  |
| 41 | Hagan, John; Kaiser, Joshua; Hanson, Anna         | 2016 | The Theory of Legal Cynicism and Sunni Insurgent Violence in Post-Invasion Iraq                                  | 81 | 2 | 316–346 | 1 | 0 | 0 | 1 | 0 | 0 | 1 | 0 |   |  |  |
| 42 | Hagan, John; Rymond-Richmond, Wenona              | 2008 | The Collective Dynamics of Racial Dehumanization and Genocidal Victimization in Darfur                           | 73 | 6 | 875–902 | 1 | 0 | 0 | 1 | 1 | 1 | 1 | 0 | 0 |  |  |
| 43 | Hagan, John; Shedd, Carla; Payne, Monique R.      | 2005 | Race, Ethnicity, and Youth Perceptions of Criminal Injustice                                                     | 70 | 3 | 381–407 | 1 | 0 | 0 | 1 | 1 | 0 | 1 | 0 |   |  |  |
| 44 | Hall, Matthew; Crowder, Kyle; Spring, Amy         | 2015 | Neighborhood Foreclosures, Racial/Ethnic Transitions, and Residential Segregation                                | 80 | 3 | 526–549 | 0 |   |   |   |   |   |   |   |   |  |  |
| 45 | Hamm, Patrick; King, Lawrence P.; Stuckler, David | 2012 | Mass Privatization, State Capacity, and Economic Growth in Post-Communist Countries                              | 77 | 2 | 295–324 | . |   |   |   |   |   |   |   |   |  |  |
| 46 | Harding, David J.                                 | 2007 | Cultural Context, Sexual Behavior, and Romantic Relationships in Disadvantaged Neighborhoods                     | 72 | 3 | 341–364 | 1 | 0 | 0 | 1 | 1 | 0 | 1 | 0 | 0 |  |  |

|    |                                                    |      |                                                                                                           |    |   |         |   |   |   |   |   |   |   |   |   |  |
|----|----------------------------------------------------|------|-----------------------------------------------------------------------------------------------------------|----|---|---------|---|---|---|---|---|---|---|---|---|--|
| 47 | Harding, David J.                                  | 2009 | Violence, Older Peers, and the Socialization of Adolescent Boys in Disadvantaged Neighborhoods            | 74 | 3 | 445–464 | 0 |   |   |   |   |   |   |   |   |  |
| 48 | Harris, Alexes; Evans, Heather; Beckett, Katherine | 2011 | Courtesy Stigma and Monetary Sanctions: Toward a Socio-Cultural Theory of Punishment                      | 76 | 2 | 234–264 | 1 | 0 | 0 | 1 | 1 | 0 | 1 | 0 | 0 |  |
| 49 | Healy, Kieran                                      | 2004 | Altruism as an Organizational Problem: The Case of Organ Procurement                                      | 69 | 3 | 387–404 | 0 |   |   |   |   |   |   |   |   |  |
| 50 | Heisig, Jan Paul                                   | 2011 | Who Does More Housework: Rich or Poor?: A Comparison of 33 Countries                                      | 76 | 1 | 74–99   | 1 | 1 | 0 | 1 | 1 | 0 | 1 | 0 | 0 |  |
| 51 | Hipp, John R.                                      | 2007 | Block, Tract, and Levels of Aggregation: Neighborhood Structure and Crime and Disorder as a Case in Point | 72 | 5 | 659–680 | 1 | 0 | 1 | 1 | 0 | 1 | 1 | 0 | 0 |  |
| 52 | Hook, Jennifer L.                                  | 2006 | Care in Context: Men’s Unpaid Work in 20 Countries, 1965–2003                                             | 71 | 4 | 639–660 | 1 | 1 | 1 | 1 | 1 | 1 | 1 | 0 | 0 |  |
| 53 | Hsu, Greta; Grodal, Stine                          | 2015 | Category Taken-for-Grantedness as a Strategic Opportunity: The Case of Light Cigarettes, 1964 to 1993     | 80 | 1 | 28–62   | . |   |   |   |   |   |   |   |   |  |
| 54 | Hughes, Melanie M.; Brush, Lisa D.                 | 2015 | The Price of Protection: A Trajectory Analysis of Civil Remedies for Abuse and Women’s Earnings           | 80 | 1 | 140–165 | 0 |   |   |   |   |   |   |   |   |  |

|    |                                                                                                                                                                                                                                                                          |      |                                                                                                        |    |   |             |   |   |   |   |   |  |   |   |  |
|----|--------------------------------------------------------------------------------------------------------------------------------------------------------------------------------------------------------------------------------------------------------------------------|------|--------------------------------------------------------------------------------------------------------|----|---|-------------|---|---|---|---|---|--|---|---|--|
| 55 | Jacobs, David;<br>Qian, Zhenchao;<br>Carmichael,<br>Jason T.; Kent,<br>Stephanie L.                                                                                                                                                                                      | 2007 | Who Survives on Death<br>Row? An Individual<br>and Contextual<br>Analysis                              | 72 | 4 | 610–<br>632 | . |   |   |   |   |  |   |   |  |
| 56 | Jennings, Elyse<br>A.; Axinn,<br>William G.;<br>Ghimire, Dirgha<br>J.                                                                                                                                                                                                    | 2012 | The Effect of Parents’<br>Attitudes on Sons’<br>Marriage Timing                                        | 77 | 6 | 923–<br>945 | 1 | 0 | 1 | 0 | 0 |  | 0 | 0 |  |
| 57 | Jæger, Mads<br>Meier                                                                                                                                                                                                                                                     | 2012 | The Extended Family<br>and Children’s<br>Educational Success                                           | 77 | 6 | 903–<br>922 | 0 |   |   |   |   |  |   |   |  |
| 58 | Joyner, Kara;<br>Kao, Grace                                                                                                                                                                                                                                              | 2005 | Interracial<br>Relationships and the<br>Transition to<br>Adulthood                                     | 70 | 4 | 563–<br>581 | 1 | 0 | 1 | 0 | 0 |  | 0 | 0 |  |
| 59 | Kalleberg, Arne<br>L.                                                                                                                                                                                                                                                    | 2009 | Precarious Work,<br>Insecure Workers:<br>Employment Relations<br>in Transition                         | 74 | 1 | 1–22        | 0 |   |   |   |   |  |   |   |  |
| 60 | Kelly, Erin L.;<br>Moen, Phyllis;<br>Oakes, J.<br>Michael; Fan,<br>Wen;<br>Okechukwu,<br>Cassandra;<br>Davis, Kelly D.;<br>Hammer, Leslie<br>B.; Kossek,<br>Ellen Ernst;<br>King, Rosalind<br>Berkowitz;<br>Hanson, Ginger<br>C.; Mierzwa,<br>Frank; Casper,<br>Lynne M. | 2014 | Changing Work and<br>Work-Family Conflict:<br>Evidence from the<br>Work, Family, and<br>Health Network | 79 | 3 | 485–<br>516 | 1 | 0 | 0 | 1 | 0 |  |   |   |  |

[illegible]

|    |                                                                                                                |      |                                                                                                                                                                         |    |   |          |   |   |   |   |   |   |   |   |   |
|----|----------------------------------------------------------------------------------------------------------------|------|-------------------------------------------------------------------------------------------------------------------------------------------------------------------------|----|---|----------|---|---|---|---|---|---|---|---|---|
| 70 | Kreager, Derek A.; Haynie, Dana L.                                                                             | 2011 | Dangerous Liaisons? Dating and Drinking Diffusion in Adolescent Peer Networks                                                                                           | 76 | 5 | 737–763  | 1 | 0 | 0 | 1 | 0 | 0 | 0 | 0 | 0 |
| 71 | Kuipers, Giseline                                                                                              | 2015 | How National Institutions Mediate the Global: Screen Translation, Institutional Interdependencies, and the Production of National Difference in Four European Countries | 80 | 5 | 985–1013 | 0 |   |   |   |   |   |   |   |   |
| 72 | Kunovich, Robert M.                                                                                            | 2009 | The Sources and Consequences of National Identification                                                                                                                 | 74 | 4 | 573–593  | 1 | 1 | 0 | 1 | 0 | 0 | 1 | 0 | 0 |
| 73 | Kwon, Seok-Woo; Heflin, Colleen; Ruef, Martin                                                                  | 2013 | Community Social Capital and Entrepreneurship                                                                                                                           | 78 | 6 | 980–1008 | 1 | 0 | 0 | 1 | 1 | 0 | 1 | 0 |   |
| 74 | LaFree, Gary; Baumer, Eric P.; O'Brien, Robert                                                                 | 2010 | Still Separate and Unequal?: A City-Level Analysis of the Black-White Gap in Homicide Arrests since 1960                                                                | 75 | 1 | 75–100   | 0 |   |   |   |   |   |   |   |   |
| 75 | Lee, Barrett A.; Farrell, Chad R.; Link, Bruce G.                                                              | 2004 | Revisiting the Contact Hypothesis: The Case of Public Exposure to Homelessness                                                                                          | 69 | 1 | 40–63    | 1 | 0 | 0 | 1 | 0 | 0 | 1 | 0 |   |
| 76 | Lee, Barrett A.; Reardon, Sean F.; Firebaugh, Glenn; Farrell, Chad R.; Matthews, Stephen A.; O'Sullivan, David | 2008 | Beyond the Census Tract: Patterns and Determinants of Racial Segregation at Multiple Geographic Scales                                                                  | 73 | 5 | 766–791  | 0 |   |   |   |   |   |   |   |   |
| 77 | Legewie, Joscha; DiPrete,                                                                                      | 2012 | School Context and the Gender Gap in                                                                                                                                    | 77 | 3 | 463–485  | 1 | 0 | 1 | 1 | 1 | 1 | 1 | 1 | 0 |





## Cody

- |    |                                                                                        |      |                                                                                                   |    |   |           |   |   |   |   |   |   |   |   |   |
|----|----------------------------------------------------------------------------------------|------|---------------------------------------------------------------------------------------------------|----|---|-----------|---|---|---|---|---|---|---|---|---|
| 92 | Matsueda, Ross L.; Kreager, Derek A.; Huizinga, David                                  | 2006 | Detering Delinquents: A Rational Choice Model of Theft and Violence                               | 71 | 1 | 95–122    | 0 |   |   |   |   |   |   |   |   |
| 93 | McFarland, Daniel A.; Moody, James; Diehl, David; Smith, Jeffrey A.; Thomas, Reuben J. | 2014 | Network Ecology and Adolescent Social Structure                                                   | 79 | 6 | 1088–1121 | 0 |   |   |   |   |   |   |   |   |
| 94 | McFarland, Daniel A.; Thomas, Reuben J.                                                | 2006 | Bowling Young: How Youth Voluntary Associations Influence Adult Political Participation           | 71 | 3 | 401–425   | 1 | 0 | 1 | 1 | 0 | 1 | 1 | 0 | 0 |
| 95 | McPherson, Miller; Smith-Lovin, Lynn; Brashears, Matthew E.                            | 2008 | Social Isolation in America: Changes in Core Discussion Networks over Two Decades                 | 73 | 6 | 1022      | . |   |   |   |   |   |   |   |   |
| 96 | McPherson, Miller; Smith-Lovin, Lynn; Brashears, Matthew E.                            | 2009 | Models and Marginals: Using Survey Evidence to Study Social Networks                              | 74 | 4 | 670–681   | 0 |   |   |   |   |   |   |   |   |
| 97 | Messner, Steven F.; Baumer, Eric P.; Rosenfeld, Richard                                | 2004 | Dimensions of Social Capital and Rates of Criminal Homicide                                       | 69 | 6 | 882–903   | 0 |   |   |   |   |   |   |   |   |
| 98 | Michelson, Ethan                                                                       | 2007 | Climbing the Dispute Pagoda: Grievances and Appeals to the Official Justice System in Rural China | 72 | 3 | 459–485   | 0 |   |   |   |   |   |   |   |   |



[illegible]

## Conflict

|     |                                                       |      |                                                                                                   |    |   |           |   |   |   |   |   |   |   |   |   |
|-----|-------------------------------------------------------|------|---------------------------------------------------------------------------------------------------|----|---|-----------|---|---|---|---|---|---|---|---|---|
| 107 | Polavieja, Javier G.                                  | 2015 | Capturing Culture: A New Method to Estimate Exogenous Cultural Effects Using Migrant Populations  | 80 | 1 | 166–191   | 1 | 1 | 1 | 1 | 0 | 0 | 0 | 0 | . |
| 108 | Rich, Peter M.; Jennings, Jennifer L.                 | 2015 | Choice, Information, and Constrained Options: School Transfers in a Stratified Educational System | 80 | 5 | 1069–1098 | 0 |   |   |   |   |   |   |   |   |
| 109 | Rippeyoung, Phyllis L. F.; Noonan, Mary C.            | 2012 | Is Breastfeeding Truly Cost Free? Income Consequences of Breastfeeding for Women                  | 77 | 2 | 244–267   | 0 |   |   |   |   |   |   |   |   |
| 110 | Rosenfeld, Jake; Denice, Patrick                      | 2015 | The Power of Transparency: Evidence from a British Workplace Survey                               | 80 | 5 | 1045–1068 | 1 | 0 | 1 | 1 | 0 | 0 | 0 | 0 | 0 |
| 111 | Rossmann, Gabriel; Esparza, Nicole; Bonacich, Phillip | 2010 | I'd Like to Thank the Academy, Team Spillovers, and Network Centrality                            | 75 | 1 | 31–51     | 0 |   |   |   |   |   |   |   |   |
| 112 | Ruiter, Stijn; Graaf, Nan Dirk de                     | 2006 | National Context, Religiosity, and Volunteering: Results from 53 Countries                        | 71 | 2 | 191–210   | 1 | 1 | 1 | 1 | 1 | 1 | 1 | 0 | 0 |
| 113 | Ruiter, Stijn; Graaf, Nan Dirk de                     | 2010 | National Religious Context and Volunteering: More Rigorous Tests Supporting the Association       | 75 | 1 | 179–184   | . |   |   |   |   |   |   |   |   |
| 114 | Ryo, Emily                                            | 2013 | Deciding to Cross: Norms and Economics of Unauthorized Migration                                  | 78 | 4 | 574–603   | 0 |   |   |   |   |   |   |   |   |

[illegible]

|     |                                                                                                                   |      |                                                                                                                        |    |   |         |   |   |   |   |   |   |   |   |   |   |
|-----|-------------------------------------------------------------------------------------------------------------------|------|------------------------------------------------------------------------------------------------------------------------|----|---|---------|---|---|---|---|---|---|---|---|---|---|
| 123 | Simons, Ronald L.; Lei, Man Kit; Beach, Steven R. H.; Brody, Gene H.; Philibert, Robert A.; Gibbons, Frederick X. | 2011 | Social Environment, Genes, and Aggression: Evidence Supporting the Differential Susceptibility Perspective             | 76 | 6 | 883–912 | 1 | 0 | 1 | 1 | 1 | 1 | 1 | 1 | . | . |
| 124 | Smith, Jeffrey A.; McPherson, Miller; Smith-Lovin, Lynn                                                           | 2014 | Social Distance in the United States: Sex, Race, Religion, Age, and Education Homophily among Confidants, 1985 to 2004 | 79 | 3 | 432–456 | 0 |   |   |   |   |   |   |   |   |   |
| 125 | Steffensmeier, Darrell J.; Schwartz, Jennifer; Roche, Michael                                                     | 2013 | Gender and Twenty-First-Century Corporate Crime: Female Involvement and the Gender Gap in Enron-Era Corporate Frauds   | 78 | 3 | 448–476 | 0 |   |   |   |   |   |   |   |   |   |
| 126 | Torche, Florencia; Villarreal, Andrés                                                                             | 2014 | Prenatal Exposure to Violence and Birth Weight in Mexico: Selectivity, Exposure, and Behavioral Responses              | 79 | 5 | 966–992 | 0 |   |   |   |   |   |   |   |   |   |
| 127 | Turco, Catherine J.                                                                                               | 2010 | Cultural Foundations of Tokenism: Evidence from the Leveraged Buyout Industry                                          | 75 | 6 | 894–913 | 0 |   |   |   |   |   |   |   |   |   |
| 128 | van der Meer, Tom; Te Grotenhuis, Manfred; Pelzer, Ben                                                            | 2010 | Influential Cases in Multilevel Modeling: A Methodological Comment                                                     | 75 | 1 | 173–178 | 0 |   |   |   |   |   |   |   |   |   |
| 129 | van Tubergen, Frank; Maas, Ineke; Flap, Henk                                                                      | 2004 | The Economic Incorporation of Immigrants in 18 Western Societies: Origin, Destination,                                 | 69 | 5 | 704–727 | 1 | 1 | 1 | 1 | 0 | 0 | 1 | 0 | 0 |   |

and Community Effects

|     |                                                   |      |                                                                                                         |    |   |         |   |   |   |   |   |   |   |   |   |
|-----|---------------------------------------------------|------|---------------------------------------------------------------------------------------------------------|----|---|---------|---|---|---|---|---|---|---|---|---|
| 130 | Villarreal, Andrés                                | 2014 | Ethnic Identification and Its Consequences for Measuring Inequality in Mexico                           | 79 | 4 | 775–806 | 1 | 0 | 0 | 1 | 1 | 1 | 1 | 1 | 0 |
| 131 | Villarreal, Andrés                                | 2010 | Stratification by Skin Color in Contemporary Mexico                                                     | 75 | 5 | 652–678 | 0 |   |   |   |   |   |   |   |   |
| 132 | Walder, Andrew G.; Isaacson, Andrew; Lu, Qinglian | 2015 | After State Socialism: The Political Origins of Transitional Recessions                                 | 80 | 2 | 444–468 | 0 |   |   |   |   |   |   |   |   |
| 133 | Walder, Andrew G.; Nguyen, Giang Hoang            | 2008 | Ownership, Organization, and Income Inequality: Market Transition in Rural Vietnam                      | 73 | 2 | 251–269 | 1 | 0 | 0 | 1 | 1 | 0 | 1 | 0 |   |
| 134 | Wejnert, Barbara                                  | 2005 | Diffusion, Development, and Democracy, 1800-1999                                                        | 70 | 1 | 53–81   | 0 |   |   |   |   |   |   |   |   |
| 135 | Wilkes, Rima; Guppy, Neil; Farris, Lily           | 2007 | Right-Wing Parties and Anti-foreigner Sentiment in Europe                                               | 72 | 5 | 831–840 | . |   |   |   |   |   |   |   |   |
| 136 | Wimmer, Andreas; Cederman, Lars-Erik; Min, Brian  | 2009 | Ethnic Politics and Armed Conflict: A Configurational Analysis of a New Global Data Set                 | 74 | 2 | 316–337 | 0 |   |   |   |   |   |   |   |   |
| 137 | Yang, Yang                                        | 2008 | Social Inequalities in Happiness in the United States, 1972 to 2004: An Age-Period-Cohort Analysis      | 73 | 2 | 204–226 | 0 |   |   |   |   |   |   |   |   |
| 138 | Yue, Lori Qingyuan                                | 2016 | The Great and the Small: The Impact of Collective Action on the Evolution of Board Interlocks after the | 81 | 2 | 374–395 | 0 |   |   |   |   |   |   |   |   |

## Panic of 1907

|     |                                           |      |                                                                                                              |    |   |         |   |   |   |   |   |   |   |   |   |  |
|-----|-------------------------------------------|------|--------------------------------------------------------------------------------------------------------------|----|---|---------|---|---|---|---|---|---|---|---|---|--|
| 139 | Zheng, Hui; Yang, Yang; Land, Kenneth C.  | 2011 | Variance Regression Hierarchical Age-Period-Cohort Models: Applications to the Study of Self-Reported Health | 76 | 6 | 955–983 | 0 |   |   |   |   |   |   |   |   |  |
| 140 | Zimmerman, Gregory M.; Messner, Steven F. | 2010 | Neighborhood Context and the Gender Gap in Adolescent Violent Crime                                          | 75 | 6 | 958–980 | 1 | 0 | 1 | 1 | 1 | 1 | 1 | 0 | 0 |  |

**Online Appendix B: Additional Simulation Results**

Figure OA1: Simulation results for main effects

a) Estimates of the main effect of  $x_{1jti}(\beta_1)$

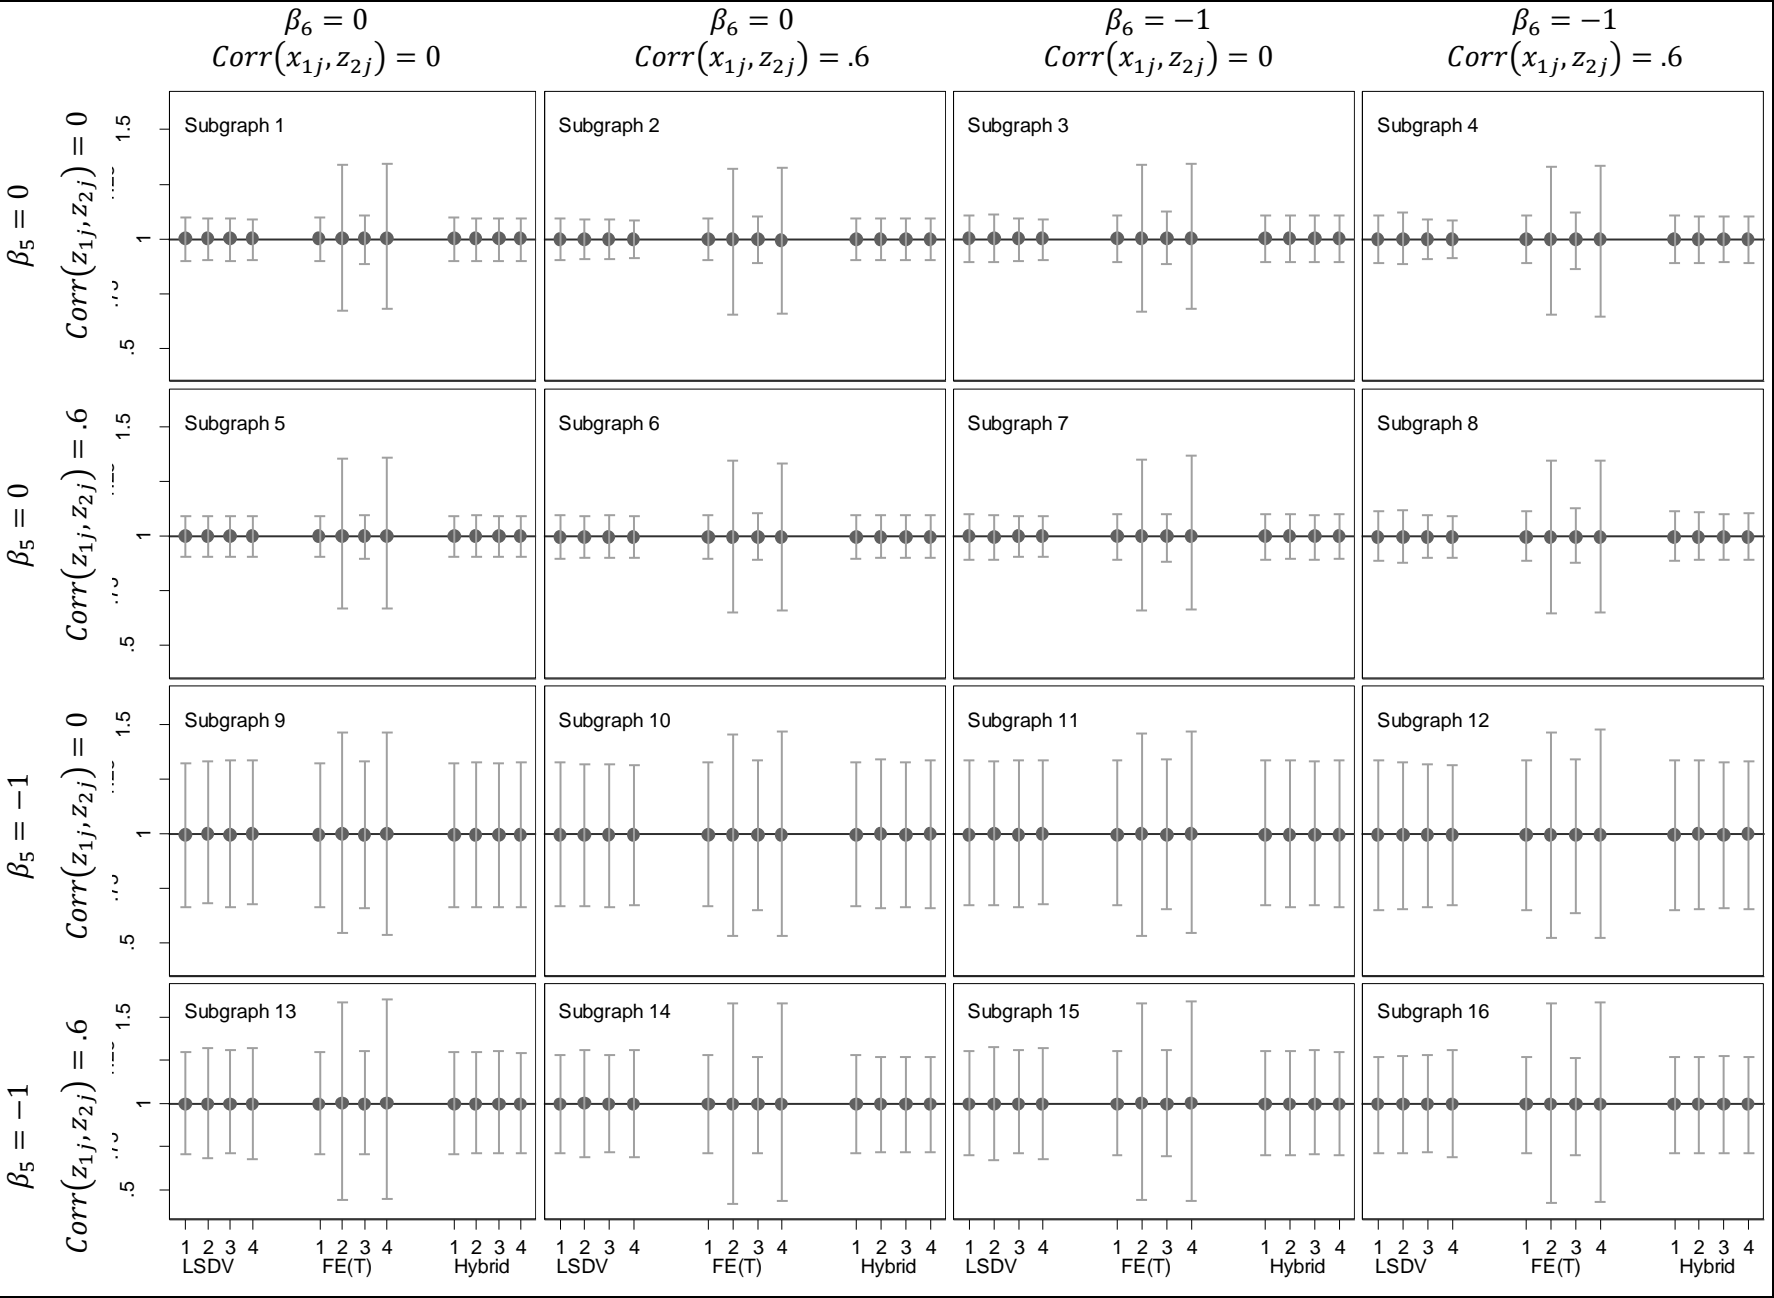



b) Estimates of the main effect of  $z_{1jt}(\beta_2)$

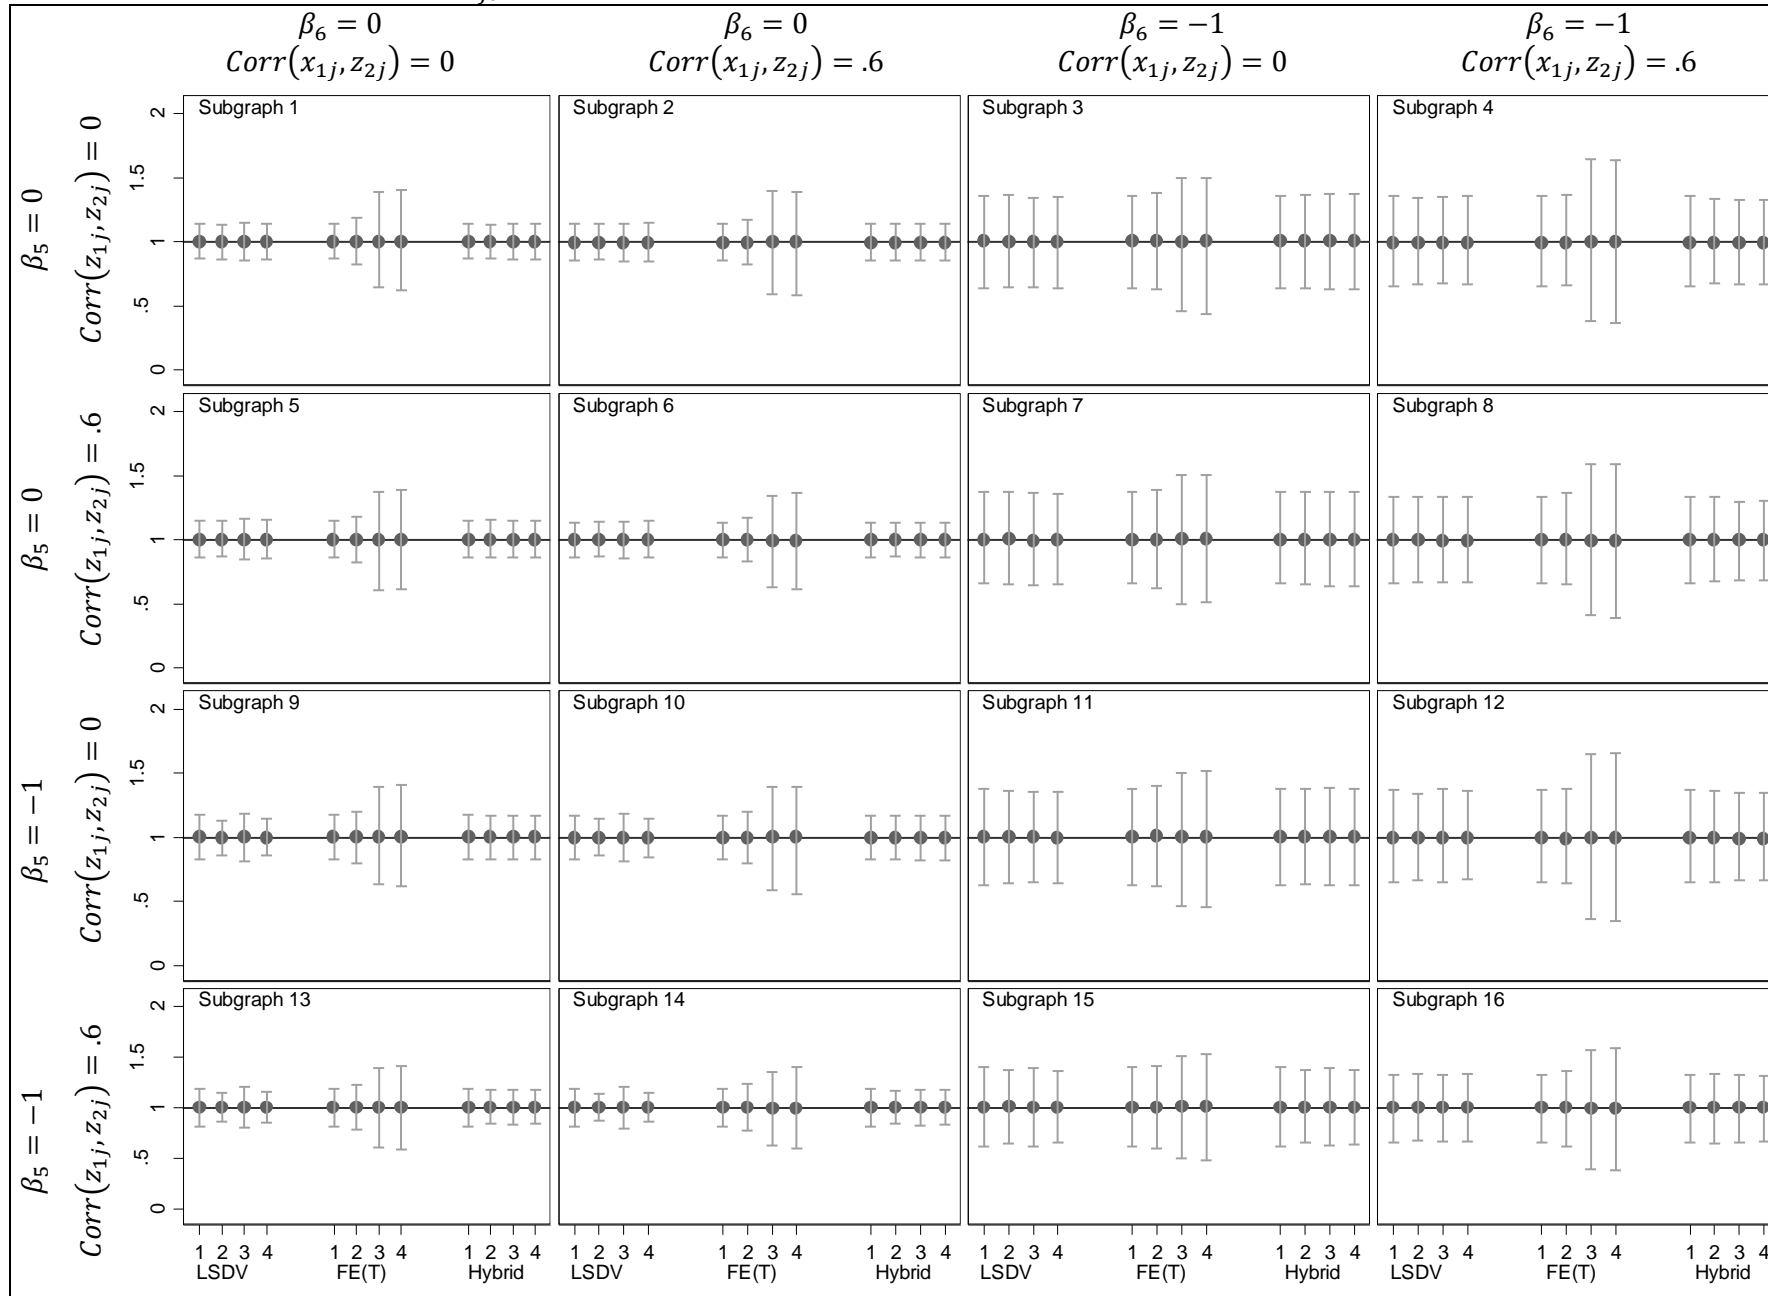

Notes: The y-axes present the estimates of the effects  $\beta_1$  (a) and  $\beta_2$  (b) across the 1,000 simulations. The dots give the average estimate, while the interval shown around them presents the space covered by the middle 95% of estimates. LSDV=Least Squares Dummy Variables; FE(T)=Fixed Effects with Transformations. The estimates from the cFES with the LSDV approach are average marginal effects calculated after the estimation of the model. More precisely, they are average marginal effects across the countries but independent of the other variables in the model. We do so because the estimate of  $\beta_1$  and  $\beta_2$  are directly conditional on the reference category of the country fixed effects and therefore not directly comparable with the approaches without dummy interactions.

## Online Appendix C: Demonstrating Equivalence of all Estimators and Showing Stata Syntax

In this section, we use an example data set to demonstrate (1) that the three approaches presented in the paper (LSDV, FE with transformation, and the hybrid approach) yield exactly identical results with balanced data and (2) how these different models can be applied to data using stata syntax.

We analyze five waves of the European Social Survey, explaining preferences for redistribution (“The government should take measures to reduce income differences”) with individual gender and income inequality (Gini Index), a country-level characteristic. We interact gender and income inequality to see whether the effect of inequality on redistributive preferences varies between men and women. In this example, the interaction effect is significant in the standard cFE specification but turns non-significant and decreases in size when controlling for effect heterogeneity in the effect of gender.

Below the following tables you will find the complete stata syntax for the presented models. The data set and do-file is also available in the online appendix.

Table OA3 presents the three different approaches applied to unbalanced data and to balanced data. The models named cFE are standard FE (or hybrid) models, which we provide as a point of reference. The models named cFES are models controlling for effect heterogeneity, where cFES1 control for effect heterogeneity in the effect of gender, CFES2 for effect heterogeneity in the effect of the Gini index and cFES3 for effect heterogeneity in the effect of both variables.

The table shows that with the original (unbalanced) data the estimated interaction effects in the cFES models are only approximately identical, while they are completely identical with balanced data. Note that in each of the different approaches, the main effect in the cFES models differ because they are each conditional in a different way. In the LSDV approach, the main effects are conditional on the moderator being zero and on the reference category of the country dummies. In the FE approach with transformations, they are conditional on the moderator being at its mean, due to the group-mean centering before building the interaction term, and in the hybrid model they are conditional on the moderator being zero. Thus, a direct comparison is only valid for the interaction effects.

**Table OA3: Comparing LSDV, FE with transformation and hybrid models using balanced and unbalanced data**

| LSDV approach                                      |          |     |          |     |          |     |          |     |          | Original data (n=119,932; 23 countries) |          |     |          |     |          |     |          |     |          | Balanced data (n=50,540; 23 countries) |  |  |  |  |  |  |  |  |  |
|----------------------------------------------------|----------|-----|----------|-----|----------|-----|----------|-----|----------|-----------------------------------------|----------|-----|----------|-----|----------|-----|----------|-----|----------|----------------------------------------|--|--|--|--|--|--|--|--|--|
| Variable                                           | cFE      |     | cFE      |     | cFES1    |     | cFES2    |     | cFES3    |                                         | cFE      |     | cFE      |     | cFES1    |     | cFES2    |     | cFES3    |                                        |  |  |  |  |  |  |  |  |  |
| Gender (male=1)                                    | -0.15013 | *** | -0.48300 | *** | -0.33477 | **  | -0.48228 | *** | -0.30616 | **                                      | -0.14927 | *** | -0.37211 | *** | -0.38506 | *   | -0.37211 | *** | -0.38506 | *                                      |  |  |  |  |  |  |  |  |  |
| Gini                                               | 0.01744  | *** | 0.01172  | *** | 0.01449  | *** | 0.01806  |     | 0.02118  |                                         | 0.02355  | *** | 0.01970  | *** | 0.02028  | *** | 0.02623  |     | 0.02681  |                                        |  |  |  |  |  |  |  |  |  |
| Gender X Gini                                      |          |     | 0.01149  | *** | 0.00586  |     | 0.01143  | *** | 0.00470  |                                         |          |     | 0.00769  |     | 0.00653  |     | 0.00769  |     | 0.00653  |                                        |  |  |  |  |  |  |  |  |  |
| Country dummies                                    | yes      |                                         | yes      |     | yes      |     | yes      |     | yes      |     | yes      |                                        |  |  |  |  |  |  |  |  |  |
| Country dummies X Gender                           |          |     |          |     | yes      |     |          |     | yes      |                                         |          |     |          |     | yes      |     |          |     | yes      |                                        |  |  |  |  |  |  |  |  |  |
| Country dummies X Gini                             |          |     |          |     |          |     | yes      |     | yes      |                                         |          |     |          |     |          |     | yes      |     | yes      |                                        |  |  |  |  |  |  |  |  |  |
| Notes: Country dummies and interactions not shown. |          |     |          |     |          |     |          |     |          |                                         |          |     |          |     |          |     |          |     |          |                                        |  |  |  |  |  |  |  |  |  |
| FE with transformation                             |          |     |          |     |          |     |          |     |          |                                         |          |     |          |     |          |     |          |     |          |                                        |  |  |  |  |  |  |  |  |  |
| Variable / Specification                           | cFE      |     | cFE      |     | cFES1    |     | cFES2    |     | cFES3    |                                         | cFE      |     | cFE      |     | cFES1    |     | cFES2    |     | cFES3    |                                        |  |  |  |  |  |  |  |  |  |
| Gender (male=1)                                    | -0.15013 | *** | -0.48300 | *** | -0.15013 | *** | -0.47973 | *** | -0.15013 | ***                                     | -0.14927 | *** | -0.37211 | *** | -0.14927 | *** | -0.37211 | *** | -0.14927 | ***                                    |  |  |  |  |  |  |  |  |  |
| Gini                                               | 0.01744  | *** | 0.01172  | *** | 0.01450  | *** | 0.01747  | *** | 0.01744  | ***                                     | 0.02355  | *** | 0.01970  | *** | 0.02028  | *** | 0.02355  | *** | 0.02355  | ***                                    |  |  |  |  |  |  |  |  |  |
| Gender X Gini                                      |          |     | 0.01149  | *** | 0.00587  |     | 0.01138  | *** | 0.00465  |                                         |          |     | 0.00769  | *** | 0.00653  |     | 0.00769  | *** | 0.00653  |                                        |  |  |  |  |  |  |  |  |  |
| Controlling EH in Gender                           |          |     |          | yes |          |     |          |     |          |                                         |          |     |          | yes |          |     |          |     |          |                                        |  |  |  |  |  |  |  |  |  |
| Controlling EH in Gini                             |          |     |          |     |          | yes |          |     |          |                                         |          |     |          |     |          | yes |          |     |          |                                        |  |  |  |  |  |  |  |  |  |
| Controlling EH in Gender and Gini                  |          |     |          |     |          |     |          | yes |          |                                         |          |     |          |     |          |     |          | yes |          |                                        |  |  |  |  |  |  |  |  |  |
| Hybrid model                                       |          |     |          |     |          |     |          |     |          |                                         |          |     |          |     |          |     |          |     |          |                                        |  |  |  |  |  |  |  |  |  |
| Variable / Specification                           | cFE      |     | cFE      |     | cFES1    |     | cFES2    |     | cFES3    |                                         | cFE      |     | cFE      |     | cFES1    |     | cFES2    |     | cFES3    |                                        |  |  |  |  |  |  |  |  |  |
| Gender (male=1)                                    | -0.15013 | *** | -0.48300 | *** | -0.49976 | *** | -0.48035 | *** | -0.50002 | ***                                     | -0.14927 | *** | -0.37211 | *** | -0.37549 | *** | -0.37211 | *** | -0.37549 | ***                                    |  |  |  |  |  |  |  |  |  |
| Gini                                               | 0.01744  | *** | 0.01172  | *** | 0.01454  | *** | -0.22017 | *** | -0.21980 | ***                                     | 0.02355  | *** | 0.01970  | *** | 0.02028  | *** | 0.01970  | *** | 0.02028  | ***                                    |  |  |  |  |  |  |  |  |  |
| Gender X Gini                                      |          |     | 0.01149  | *** | 0.00587  |     | 0.01140  | *** | 0.00472  |                                         |          |     | 0.00769  | *** | 0.00653  |     | 0.00769  | *** | 0.00653  |                                        |  |  |  |  |  |  |  |  |  |
| Controlling EH in Gender                           |          |     |          | yes |          |     |          |     |          |                                         |          |     |          | yes |          |     |          |     |          |                                        |  |  |  |  |  |  |  |  |  |
| Controlling EH in Gini                             |          |     |          |     |          | yes |          |     |          |                                         |          |     |          |     |          | yes |          |     |          |                                        |  |  |  |  |  |  |  |  |  |
| Controlling EH in Gender and Gini                  |          |     |          |     |          |     |          | yes |          |                                         |          |     |          |     |          |     |          | yes |          |                                        |  |  |  |  |  |  |  |  |  |
| Notes: Between effects and interactions not shown. |          |     |          |     |          |     |          |     |          |                                         |          |     |          |     |          |     |          |     |          |                                        |  |  |  |  |  |  |  |  |  |

Notes: \* p<.05, \*\* p<.01, \*\*\* p<.001.

## Stata Syntax for above examples:

```
use example_data_crosslevel.dta, clear
```

```
*****
* Example data: 5 rounds of ESS combined with country-level data on Inequality (Gini Index) *
* DV = attitudes towards income redistribution ("The government should take measures to reduce differences in income levels") *
* UVs = gender (gndr), inequality (gini_d) *
* Research question: Does the effect of inequality on redistributive preferences vary between men and women? *
*****

* Drop countries which have no within variation of macro variable of interest
drop if Country == 196 | Country == 246 | Country == 376 | Country == 442

* LSDV approach
reg gincdif c.gndr c.gini_d i.Country // standard cFE model, main effect only
est store lsdv1
reg gincdif c.gndr#c.gini_d i.Country // standard cFE model with added interaction
est store lsdv2
reg gincdif c.gndr#c.gini_d i.Country#c.gndr // CFES model controlling for effect heterogeneity in gndr
est store lsdv3
reg gincdif c.gndr#c.gini_d i.Country#c.gini_d // CFES model controlling for effect heterogeneity in gini_d
est store lsdv4
reg gincdif c.gndr#c.gini_d i.Country#c.gini_d i.Country#c.gndr // CFES model controlling for effect heterogeneity in gini_d and gndr
est store lsdv5

est tab lsdv1 lsdv2 lsdv3 lsdv4 lsdv5, star // show complete models

est tab lsdv1 lsdv2 lsdv3 lsdv4 lsdv5, star keep(gndr gini_d c.gndr#c.gini_d) // omit country fixed effects and slopes

* Generate some new variables for FE with transformation and hybrid approach

* generate country-specific means of all variables
foreach var of varlist gndr gini_d {
    bys Country: egen `var'_m = mean(`var')
}

* generate demeaned versions of the two interacting variables
gen gndr_dm = gndr-gndr_m
gen gini_dm = gini_d-gini_d_m

* generate various versions of the interaction term
gen ia_gndrgini_oo=gndr*gini_d // for standard cFE and hybrid approach
gen ia_gndrgini_dd=gndr_dm*gini_dm // for cFES with (extended) FE transformations
gen ia_gndrgini_do=gndr_dm*gini_d // for cFES with (extended) FE transformations
gen ia_gndrgini_od=gndr*gini_dm // for cFES with (extended) FE transformations
gen ia_gndrgini_om=gndr*gini_d_m // for cFES hybrid models
gen ia_gndrgini_mo=gndr_m*gini_d // for cFES hybrid models
```

```

bys Country: egen ia_gndrgini_oo_m = mean(ia_gndrgini_oo)  // for standard hybrid approach

* cFES model with (extended) FE transformations
xtreg gincdif c.gndr c.gini_d , fe i(Country) // standard cFE approach
est store fet1
xtreg gincdif c.gndr c.gini_d ia_gndrgini_oo, fe i(Country) // standard cFE approach with additional interaction
est store fet2
xtreg gincdif c.gndr c.gini_d ia_gndrgini_od, fe i(Country) // cFES model controlling for effect heterogeneity in gndr
est store fet3
xtreg gincdif c.gndr c.gini_d ia_gndrgini_do, fe i(Country) // cFES model controlling for effect heterogeneity in gini
est store fet4
xtreg gincdif c.gndr c.gini_d ia_gndrgini_dd, fe i(Country) // cFES model controlling for effect heterogeneity in both
est store fet5

est tab fet1 fet2 fet3 fet4 fet5, star // show models

* cFES hybrid models
mixed gincdif c.gndr c.gini_d gndr_m gini_d_m || Country: , mle var // standard hybrid model
est store hyb1
mixed gincdif c.gndr c.gini_d ia_gndrgini_oo gndr_m gini_d_m ia_gndrgini_oo_m || Country: , mle var // standard hybrid approach with additional interaction
est store hyb2
mixed gincdif c.gndr c.gini_d ia_gndrgini_oo gndr_m gini_d_m ia_gndrgini_om || Country: , mle var // controlling for effect heterogeneity in gndr
est store hyb3
mixed gincdif c.gndr c.gini_d ia_gndrgini_oo gndr_m gini_d_m ia_gndrgini_mo || Country: , mle var // controlling for effect heterogeneity in gini
est store hyb4
mixed gincdif c.gndr c.gini_d ia_gndrgini_oo gndr_m gini_d_m ia_gndrgini_om ia_gndrgini_mo || Country: , mle var // controlling for effect heterog. in both
est store hyb5

est tab hyb1 hyb2 hyb3 hyb4 hyb5, star // show models

* Compare LSDV, FE transformation and hybrid models
est tab lsdv1 fet1 hyb1, star keep(c.gndr gini_d ) /// // estimates exactly identical, as expected
equations(1)
est tab lsdv2 fet2 hyb2, star keep(c.gndr gini_d /// // estimates exactly identical, as expected
ia_gndrgini_oo c.gndr#c.gini_d) equations(1)
est tab lsdv3 fet3 hyb3, star keep(c.gndr gini_d /// // estimates not exactly identical, as noted in note 14 in the paper
ia_gndrgini_oo ia_gndrgini_od c.gndr#c.gini_d) equations(1)
est tab lsdv4 fet4 hyb4, star keep(c.gndr gini_d /// // estimates not exactly identical, as noted in note 14 in the paper
ia_gndrgini_oo ia_gndrgini_do c.gndr#c.gini_d) equations(1)
est tab lsdv5 fet5 hyb5, star keep(c.gndr gini_d /// // estimates not exactly identical, as noted in note 14 in the paper
ia_gndrgini_oo ia_gndrgini_dd c.gndr#c.gini_d) equations(1)

*****
* Demonstrate exact equivalence of estimators with balanced data
* Note: The following code is exactly identical to the former code,
* only that we draw a balanced sample before estimating the models

use example_data_crosslevel.dta, clear

* Drop countries which have no within variation of macro variable of interest
drop if Country == 196 | Country == 246 | Country == 376 | Country == 442

```

```

* Draw balanced sample
sample 266, count by(Country Year gndr)           // 266 is the smallest n observed in the three dimensional frequency table "Country-Year-Gender"

* LSDV approach
reg gincdif c.gndr c.gini_d i.Country             // standard cFE model, main effect only
est store lsdv1
reg gincdif c.gndr##c.gini_d i.Country            // standard cFE model with added interaction
est store lsdv2
reg gincdif c.gndr##c.gini_d i.Country##c.gndr     // CFES model controlling for effect heterogeneity in gndr
est store lsdv3
reg gincdif c.gndr##c.gini_d i.Country##c.gini_d   // CFES model controlling for effect heterogeneity in gini_d
est store lsdv4
reg gincdif c.gndr##c.gini_d i.Country##c.gini_d i.Country#c.gndr // CFES model controlling for effect heterogeneity in gini_d and gndr
est store lsdv5

est tab lsdv1 lsdv2 lsdv3 lsdv4 lsdv5, star        // show complete models

est tab lsdv1 lsdv2 lsdv3 lsdv4 lsdv5 , ///
      keep(gndr gini_d c.gndr#c.gini_d )           // omit country fixed effects and slopes

* Generate some new variables for FE with transformation and hybrid approach

* generate country-specific means of all variables
foreach var of varlist gndr gini_d {
    bys Country: egen `var'_m = mean(`var')
}

* generate demeaned versions of the two interacting variables
gen gndr_dm = gndr-gndr_m
gen gini_dm = gini_d-gini_d_m

* generate various versions of the interaction term
gen ia_gndrgini_oo=gndr*gini_d                    // for standard cFE and hybrid approach
gen ia_gndrgini_dd=gndr_dm*gini_dm                 // for cFES with (extended) FE transformations
gen ia_gndrgini_do=gndr_dm*gini_d                 // for cFES with (extended) FE transformations
gen ia_gndrgini_od=gndr*gini_dm                   // for cFES with (extended) FE transformations
gen ia_gndrgini_om=gndr*gini_d_m                  // for cFES hybrid models
gen ia_gndrgini_mo=gndr_m*gini_d                  // for cFES hybrid models

bys Country: egen ia_gndrgini_oo_m = mean(ia_gndrgini_oo) // for standard hybrid approach

* cFES model with (extended) FE transformations
xtreg gincdif c.gndr c.gini_d , fe i(Country)      // standard cFE approach
est store fet1
xtreg gincdif c.gndr c.gini_d ia_gndrgini_oo, fe i(Country) // standard cFE approach with additional interaction
est store fet2
xtreg gincdif c.gndr c.gini_d ia_gndrgini_od, fe i(Country) // cFES model controlling for effect heterogeneity in gndr
est store fet3
xtreg gincdif c.gndr c.gini_d ia_gndrgini_do, fe i(Country) // cFES model controlling for effect heterogeneity in gini
est store fet4
xtreg gincdif c.gndr c.gini_d ia_gndrgini_dd, fe i(Country) // cFES model controlling for effect heterogeneity in both

```

```

est store fet5

est tab fet1 fet2 fet3 fet4 fet5, star                // show models

* cFES hybrid models
mixed gincdif c.gndr c.gini_d  gndr_m gini_d_m || Country: , mle var      // standard hybrid model
est store hyb1
mixed gincdif c.gndr c.gini_d  ia_gndrgini_oo gndr_m gini_d_m ia_gndrgini_oo_m || Country: , mle var    // standard hybrid approach with additional interaction
est store hyb2
mixed gincdif c.gndr c.gini_d  ia_gndrgini_oo gndr_m gini_d_m ia_gndrgini_om    || Country: , mle var    // controlling for effect heterogeneity in gndr
est store hyb3
mixed gincdif c.gndr c.gini_d  ia_gndrgini_oo gndr_m gini_d_m ia_gndrgini_mo    || Country: , mle var    // controlling for effect heterogeneity in gini
est store hyb4
mixed gincdif c.gndr c.gini_d  ia_gndrgini_oo gndr_m gini_d_m ia_gndrgini_om ia_gndrgini_mo || Country: , mle var    // controlling for effect hetero. in both
est store hyb5

est tab hyb1 hyb2 hyb3 hyb4 hyb5, star                // show models

* Compare LSDV, FE transformation and hybrid models
est tab lsdv1 fet1 hyb1, star keep(c.gndr gini_d ) ///          // estimates exactly identical, as expected
    equations(1)
est tab lsdv2 fet2 hyb2, star keep(c.gndr gini_d  ///          // estimates exactly identical, as expected
    ia_gndrgini_oo c.gndr#c.gini_d) equations(1)
est tab lsdv3 fet3 hyb3, star keep(c.gndr gini_d  ///          // estimates not exactly identical, as noted in note 14 in the paper
    ia_gndrgini_oo ia_gndrgini_od c.gndr#c.gini_d) equations(1)
est tab lsdv4 fet4 hyb4, star keep(c.gndr gini_d  ///          // estimates not exactly identical, as noted in note 14 in the paper
    ia_gndrgini_oo ia_gndrgini_do c.gndr#c.gini_d) equations(1)
est tab lsdv5 fet5 hyb5, star keep(c.gndr gini_d  ///          // estimates not exactly identical, as noted in note 14 in the paper
    ia_gndrgini_oo ia_gndrgini_dd c.gndr#c.gini_d) equations(1)

```
